# Supplementary material for: Electrophysiological hallmarks for event relations and event roles in working memory
Source: Frontiers journal article supplement (doi:10.3389/fnins.2023.1282869), 2024-01-23
Supplement: Image_1.pdf [file Image_1.pdf]

## Supplementary Materials

### Electrophysiological hallmarks for event relations and event roles in working memory

Xinchi Yu<sup>1,2</sup>, Jialu Li<sup>3,4,5</sup>, Hao Zhu<sup>3,4,5</sup>, Xing Tian<sup>3,4,5</sup>, Ellen Lau<sup>1,2</sup>

<sup>1</sup> Program of Neuroscience and Cognitive Science, University of Maryland, College Park, MD, USA

<sup>2</sup> Department of Linguistics, University of Maryland, College Park, MD, USA

<sup>3</sup> Division of Arts and Sciences, New York University Shanghai, Shanghai, China

<sup>4</sup> Shanghai Key Laboratory of Brain Functional Genomics (Ministry of Education), School of Psychology and Cognitive Science, East China Normal University, Shanghai, China

<sup>5</sup> NYU-ECNU Institute of Brain and Cognitive Science at NYU Shanghai, Shanghai, China

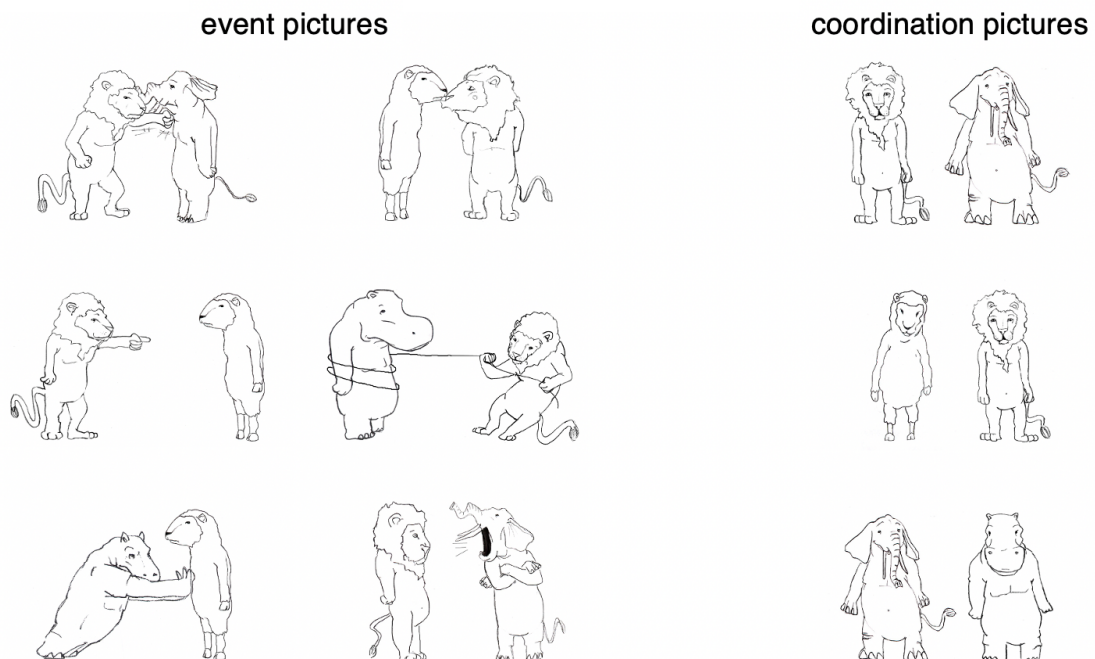

**Figure S1.** Examples of the event pictures and coordination pictures used in the current experiment.
